# Supplementary material for: Prevalence of chromosomal alterations in first-trimester spontaneous pregnancy loss
Source: PubMed Central journal article supplement (PMC10719097; doi:10.1038/s41591-023-02645-5), 2023-11-23
Supplement: 41591_2023_2645_MOESM1_ESM.pdf [file 41591_2023_2645_MOESM1_ESM.pdf]

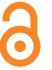

---

# Prevalence of chromosomal alterations in first-trimester spontaneous pregnancy loss

---

In the format provided by the authors and unedited

**Supplementary Table 1 |** Logistic regression analysis of parental, gestational age and abnormality status.

Maternal, paternal and gestational age on genomic status of tissue samples (normal, abnormal)  
Coefficients and confidence intervals

|                 | Estimate | Std. Error | Z value | Pr(> z ) | 2.5 %      | 97.5 %     |
|-----------------|----------|------------|---------|----------|------------|------------|
| (Intercept)     | -0.44421 | 0.40332    | -1.101  | 0.271    | 0,28993311 | 1,41106131 |
| Paternal age    | 0.01244  | 0.01346    | 0.924   | 0.356    | 0,98624736 | 1,0397907  |
| Maternal age    | 0.00842  | 0.01477    | 0.570   | 0.569    | 0,9796628  | 1,03814665 |
| Gestational age | 0.01627  | 0.02902    | 0.561   | 0.575    | 0,96049016 | 1,07655417 |

Maternal and paternal age on genomic status of tissue samples (normal, abnormal)  
Coefficients and confidence intervals

|              | Estimate | Std. Error | Z value | Pr(> z ) | 2.5 %      | 97.5 %     |
|--------------|----------|------------|---------|----------|------------|------------|
| (Intercept)  | -0.59236 | 0.28226    | -2.099  | 0.0358   | 0,3173412  | 0,96013088 |
| Paternal age | 0.01410  | 0.01191    | 1.184   | 0.2365   | 0,99087323 | 1,03829935 |
| Maternal age | 0.01381  | 0.01277    | 1.081   | 0.2795   | 0,98885307 | 1,03967305 |

Paternal age on genomic status of tissue samples (normal, abnormal)  
Coefficients and confidence intervals

|              | Estimate  | Std. Error | Z value | Pr(> z )       | 2.5 %      | 97.5 %     |
|--------------|-----------|------------|---------|----------------|------------|------------|
| (Intercept)  | -0.478889 | 0.262114   | -1.827  | 0.06770        | 0,36967328 | 1,03356382 |
| Paternal age | 0.023349  | 0.008339   | 2.800   | <b>0.00511</b> | 1,00711936 | 1,04061187 |

Maternal age on genomic status of tissue samples (normal, abnormal)  
Coefficients and confidence intervals

|              | Estimate  | Std. Error | Z value | Pr(> z )         | 2.5 %      | 97.5 %     |
|--------------|-----------|------------|---------|------------------|------------|------------|
| (Intercept)  | -0.856824 | 0.229770   | -3.729  | <b>0.000192</b>  | 0,27010982 | 0,66507459 |
| Maternal age | 0.031344  | 0.007919   | 3.958   | <b>7. 55e-05</b> | 1,01600643 | 1,04805353 |

**Supplementary Table 2 | Aberrations detected in POCs after PL by genome haplarithmis.**

| Sample | Gestational age by ultrasound (week) | Tissue | Aberration  | Chr. | Size (Mb) | Mosaicism (%) |
|--------|--------------------------------------|--------|-------------|------|-----------|---------------|
| PL2650 | 4.5                                  | CV     | Trisomy     | 16   | 88.7      | 90            |
|        |                                      | EM     | Trisomy     |      | 88.7      | 97.5          |
| PL140  | 4.5                                  | CV     | Trisomy     | 16   | 88.7      | 87.5          |
|        |                                      | EM     | Trisomy     |      | 88.7      | 85            |
| PL2074 | 5.5                                  | CV     | UPD         | 7    | 160.6     | 30            |
|        |                                      | EM     | Monosomy    |      | 160.6     | 50            |
| PL2682 | 5.5                                  | CV     | Trisomy     | 19   | 61.7      | 35            |
|        |                                      | EM     | Trisomy     |      | 61.7      | 90            |
| PL1618 | 6.0                                  | CV     | Duplication | 5    | ~2.7      | 20            |
|        |                                      | EM     | Duplication |      | ~2.7      | 17.5          |
| PL2660 | 6.0                                  | CV     | Trisomy     | 14   | 101.2     | 85            |
|        |                                      | EM     | Trisomy     |      | 101.2     | 87.5          |
| PL2678 | 6.0                                  | CV     | Trisomy     | 16   | 88.7      | 97.5          |
|        |                                      | EM     | Trisomy     |      | 88.7      | 97.5          |
| PL1400 | 6.1                                  | CV     | Trisomy     | 16   | 88.7      | 85            |
|        |                                      | EM     | Trisomy     |      | 88.7      | 87.5          |
| PL1783 | 6.1                                  | CV     | Trisomy     | 2    | 242.7     | 97.5          |
|        |                                      | EM     | Trisomy     |      | 242.7     | 85            |
| PL2733 | 6.2                                  | CV     | Trisomy     | 16   | 88.7      | 90            |
|        |                                      | EM     | Trisomy     |      | 88.7      | 90            |
| PL2726 | 6.4                                  | CV     | Normal      | GW   | -         | 0             |
|        |                                      | EM     | Trisomy     | 13   | 113.6     | 80            |
|        |                                      | CV     | UPD         | 1    | 248.4     | 15            |
|        |                                      | EM     | UPD         |      | 248.4     | 65            |
| PL2727 | 6.5                                  | CV     | Trisomy     | 9    | 150.6     | 100           |
|        |                                      | EM     | Trisomy     |      | 150.6     | 97.5          |
| PL2653 | 6.7                                  | CV     | Trisomy     | 2    | 242.7     | 100           |
|        |                                      | EM     | Trisomy     |      | 242.7     | 100           |
| PL2087 | 7.0                                  | CV     | Trisomy     | 15   | 99.8      | 90            |
|        |                                      | EM     | Trisomy     |      | 99.8      | 85            |
| PL1744 | 7.0                                  | CV     | Trisomy     | 22   | 51.3      | 87.5          |
|        |                                      | EM     | Trisomy     |      | 51.3      | 87.5          |
| PL2621 | 7.4                                  | CV     | Trisomy     | 7    | 160.6     | 97.5          |
|        |                                      | EM     | Trisomy     |      | 160.6     | 100           |
| PL1595 | 7.5                                  | CV     | Trisomy     | 18   | 80.5      | 87.5          |
|        |                                      | EM     | Trisomy     |      | 80.5      | 87.5          |
| PL2016 | 7.5                                  | CV     | Polyploidy  | GW   | -         | NA            |
|        |                                      | EM     | Polyploidy  |      | -         | NA            |
| PL1359 | 8.0                                  | CV     | Trisomy     | 6    | 172.1     | 87.5          |
|        |                                      | EM     | Trisomy     |      | 172.1     | 87.5          |
| PL2019 | 8.0                                  | CV     | Deletion    | 1    | ~44.7     | 30            |
|        |                                      | EM     | Deletion    |      | ~44.7     | 40            |
|        |                                      | CV     | Duplication | 4    | ~18.3     | 5             |
|        |                                      | EM     | Duplication |      | ~18.3     | 32.5          |
| PL401  | 8.0                                  | CV     | Monosomy    | 11   | 135.1     | 10            |
|        |                                      | EM     | Monosomy    |      | 135.1     | 10            |
| PL2728 | 8.1                                  | CV     | Trisomy     | 15   | 99.8      | 90            |
|        |                                      | EM     | Trisomy     |      | 99.8      | 90            |

|        |      |    |             |    |       |      |
|--------|------|----|-------------|----|-------|------|
| PL1701 | 8.4  | CV | Trisomy     | 5  | 182.0 | 10   |
|        |      | EM | Trisomy     |    | 182.0 | 37.5 |
| PL2702 | 8.5  | CV | Trisomy     | 15 | 99.8  | 90   |
|        |      | EM | Trisomy     |    | 99.8  | 87.5 |
| PL444  | 8.5  | CV | Trisomy     | 14 | 101.2 | 45   |
|        |      | EM | Trisomy     |    | 101.2 | 72.5 |
| PL1896 | 8.6  | CV | Monosomy    | X  | 154.3 | 100  |
|        |      | EM | Monosomy    |    | 154.3 | 100  |
| PL2452 | 8.6  | EM | Trisomy     | 21 | 45.1  | 100  |
|        |      | CV | Trisomy     |    | 45.1  | 100  |
| PL2451 | 9.5  | CV | Polyploidy  | GW | -     | 100  |
|        |      | EM | Polyploidy  |    | -     | 95   |
| PL2701 | 10.3 | CV | Trisomy     | 15 | 99.8  | 95   |
|        |      | EM | Trisomy     |    | 99.8  | 95   |
| PL2137 | 13.0 | CV | Trisomy     | 7  | 160.6 | 30   |
|        |      | EM | Trisomy     |    | 160.6 | 40   |
| PL1758 | NA   | CV | Tetrasomy   | 2  | 242.7 | NA   |
|        |      | EM | Tetrasomy   |    | 242.7 | NA   |
|        |      | CV | Tetrasomy   | 7  | 160.6 | 45   |
|        |      | EM | Tetrasomy   |    | 160.6 | 40   |
|        |      | CV | Polyploidy  | GW | -     | 100  |
|        |      | EM | Polyploidy  |    | -     | 90   |
| PL2223 | NA   | CV | Monosomy    | X  | 154.3 | 35   |
|        |      | EM | Normal      | GW | -     | 0    |
| PL245  | NA   | CV | Deletion    | 5  | ~16.7 | 80   |
|        |      | EM | Deletion    |    | ~16.7 | 80   |
|        |      | CV | Duplication | 7  | ~43.2 | 35   |
|        |      | EM | Duplication |    | ~43.2 | 45   |

**Supplementary Table 3** | Chromosomal microarray studies of PLs with >1000 samples, without previous karyotyping.

| No           | Study                                | Clinical specimen                     | Microarray technology                                                                                                                                                    | Total cases (#) | Cases with chromosomal abnormalities (#) | Prevalence (%) |
|--------------|--------------------------------------|---------------------------------------|--------------------------------------------------------------------------------------------------------------------------------------------------------------------------|-----------------|------------------------------------------|----------------|
| 1            | Levy et al., 2014 (PMID: 25004334)   | Miscarriages (<20 weeks of gestation) | Illumina CytoSNP-12                                                                                                                                                      | 1861            | 1118                                     | 60.1           |
| 2            | Zhou et al., 2016 (PMID: 27020032)   | POC from PL                           | Agilent 60K aCGH                                                                                                                                                         | 1235            | 507                                      | 41.1           |
| 3            | Chen et al., 2017 (PMID: 28247551)   | POC from PL                           | Version 7.6 Oligo, Baylor, WGS                                                                                                                                           | 2186            | 975                                      | 44.6           |
| 4            | Peng and Yuan, 2018 (PMID: 30369481) | POC from PL                           | Affymetrix CytoScan 750K                                                                                                                                                 | 2505            | 959                                      | 38.3           |
| 5            | Li et al., 2020 (PMID: 32626971)     | Miscarriages                          | Agilent aCGH, 60K, Ic-NGS                                                                                                                                                | 1401            | 693                                      | 49.5           |
| 6            | Wang et al., 2021 (PMID: 33069876)   | Miscarriages (<13 weeks of gestation) | Affymetrix CytoScan 750K, QF-PCR, HSPA                                                                                                                                   | 1042            | 698                                      | 67.0           |
| 7            | Finley et al., 2022 (PMID: 35523710) | POC (fresh/FFPE) from PL              | Illumina CytoSNP-12                                                                                                                                                      | 24900           | 13909                                    | 55.9           |
| 8            | Sahoo et al., 2017 (PMID: 35523710)  | RPL                                   | CMA or SNP-array (3520 clones, BAC-clone-based array-CGH (CombiMatrix), 180334 oligonucleotide probes oligonucleotide array (Agilent) or CytoSNP-850 K array (Illumina)) | 7396            | 3975                                     | 53.7           |
| <b>Total</b> |                                      |                                       |                                                                                                                                                                          | <b>42526</b>    | <b>22834</b>                             | <b>53.7</b>    |

**Supplementary Table 4** | Chromosomal microarray studies of PLs, where karyotyping was performed previously by conventional karyotyping techniques.

| <b>№</b>     | <b>Study</b>                                   | <b>Clinical specimens</b> | <b>Methods</b>                                                                                            | <b>Total cases with normal karyotype</b> | <b>Additionally detected chromosomal abnormalities</b> | <b>%</b>    |
|--------------|------------------------------------------------|---------------------------|-----------------------------------------------------------------------------------------------------------|------------------------------------------|--------------------------------------------------------|-------------|
| 1            | Shimokawa et al., 2006 (PMID: 16906550)        | PLs with normal karyotype | BAC Array – 1 Mb System, Spectral Genomics, Houston. TX. USA                                              | 20                                       | 2                                                      | 10.0        |
| 2            | Zhang et al., 2009 (PMID: 19215247)            | First-trimester PLs       | oligonucleotide-based array-CGH with a 244K chip (Agilent Technologies))                                  | 58                                       | 13                                                     | 22.4        |
| 3            | Warren et al., 2009 (PMID: 20168112)           | Fetal loss at 10–20 weeks | Spectral 2600 whole genome BAC array (PerkinElmer) and Agilent 244 K oligonucleotide array to confirm it) | 30                                       | 4                                                      | 13.3        |
| 4            | Rajcan-Separovic et al., 2010 (PMID: 20847186) | RPL                       | Agilent 105 K oligonucleotides array-CGH                                                                  | 26                                       | 11                                                     | 42.3        |
| 5            | Kooper et al., 2014 (PMID: 24428858)           | Intrauterine fetal death  | Affymetrix GeneChip 250 k (Nspl) SNP-array) for 71 samples and CytoScan HD, 2.6 M for 97 samples          | 167                                      | 31                                                     | 18.6        |
| 6            | Bug et al., 2014 (PMID: 25013457)              | POCs                      | CGH + SNP8×60K microarrays (BlueGnome Ltd., Cambridge, UK) (customized)                                   | 34                                       | 4                                                      | 11.8        |
| <b>Total</b> |                                                |                           |                                                                                                           | <b>335</b>                               | <b>65</b>                                              | <b>19.4</b> |
|              | Present study                                  | POCs                      | SNP-array + Genome haplarithmisis                                                                         | 94                                       | 33                                                     | 35.1        |
| <b>Total</b> |                                                |                           |                                                                                                           | <b>429</b>                               | <b>98</b>                                              | <b>22.8</b> |

**Supplementary Table 5 | Degree of mosaicism and gestational age in week bins.**

| Segregational origin | Tissue | Mosaicism % (mean $\pm$ sd) |    |                 |    | P value* |
|----------------------|--------|-----------------------------|----|-----------------|----|----------|
|                      |        | Weeks 4-7                   | n  | Weeks 8-13      | n  |          |
| Mitotic              | CV     | 46.4 $\pm$ 38.7             | 7  | 38.6 $\pm$ 38.2 | 7  | 1.00     |
|                      | EM     | 67.9 $\pm$ 26.4             |    | 48.9 $\pm$ 30.8 |    | 0.33     |
| Meiotic              | CV     | 88.2 $\pm$ 18.4             | 11 | 84.5 $\pm$ 22.8 | 5  | 1.00     |
|                      | EM     | 92.3 $\pm$ 6.30             |    | 89.0 $\pm$ 10.4 |    | 0.77     |
| Mitotic and meiotic  | CV     | 71.9 $\pm$ 34.1             | 18 | 61.0 $\pm$ 39.4 | 13 | 0.81     |
|                      | EM     | 82.8 $\pm$ 20.5             |    | 68.3 $\pm$ 31.5 |    | 0.43     |

\*2-sided Mann Whitney U test

**Supplementary Table 6 | Excluded samples.**

| ID     | Group | Maternal age | Paternal age | Gestational age | Total PLs | Exclusion reason | Affected member           |
|--------|-------|--------------|--------------|-----------------|-----------|------------------|---------------------------|
| PL137  | SPL   | 24           | 25           | NA              | 1         | Bad quality DNA  | Father                    |
| PL142  | SPL   | 34           | NA           | NA              | 1         | Bad quality DNA  | EM & CV                   |
| PL158  | SPL   | 25           | 24           | NA              | 1         | Mix up           | Mother & father           |
| PL167  | SPL   | 19           | 22           | NA              | 1         | Bad quality DNA  | Mother                    |
| PL228  | SPL   | 34           | 34           | NA              | 1         | Bad quality DNA  | Mother & father & EM & CV |
| PL241  | SPL   | 30           | 43           | NA              | 1         | Mix up           | Father                    |
| PL246  | SPL   | 30           | 30           | NA              | 1         | Bad quality DNA  | EM & CV                   |
| PL250  | RPL   | 29           | 29           | NA              | 4         | Bad quality DNA  | Mother & father & EM & CV |
| PL278  | SPL   | 33           | 37           | NA              | 1         | Bad quality DNA  | Mother                    |
| PL379  | SPL   | 22           | 22           | 10              | 1         | Bad quality DNA  | EM & CV                   |
| PL384  | RPL   | 24           | 25           | 13              | 2         | Bad quality DNA  | EM                        |
| PL588  | RPL   | 27           | 27           | 10              | 3         | Bad quality DNA  | Father                    |
| PL714  | RPL   | 23           | 25           | 6               | 3         | Bad quality DNA  | Mother                    |
| PL822  | SPL   | 31           | 26           | 7               | 1         | Mix up           | Mother & father           |
| PL915  | SPL   | 25           | 33           | 6               | 1         | Bad quality DNA  | EM                        |
| PL920  | SPL   | 28           | 33           | 5,5             | 1         | Bad quality DNA  | Mother                    |
| PL1362 | RPL   | 24           | 23           | 6               | 2         | Bad quality DNA  | EM & CV                   |
| PL2178 | RPL   | 25           | 31           | 8               | 3         | Bad quality DNA  | Mother                    |
| PL2730 | RPL   | 30           | 28           | 7,4             | 3         | Bad quality DNA  | CV                        |
| PL2734 | RPL   | 43           | 37           | 8,2             | 7         | Mix up           | Mother                    |

SPL, sporadic pregnancy loss; RPL, recurrent pregnancy loss; EM, extraembryonic mesoderm; CV, chorionic villi.
